# Supplementary material
Source: publisher figshare collection journal article supplement (https://frontiersin.figshare.com/ndownloader/files/34204175)
Supplement: Supplementary file [file 34204175]

|                                                                        | <i>LCF=1-3</i>                                                                                                                                                                                                                                                                                                                                                                                                                                                                                                                                                                                                                                      | <i>LCF=4-6</i>                                                                                                                                                                                                                                                                                                                                                                                                                                                                                                                                                                                                                                                                                                                                                                                                                                                                                                                                                                                                                                                                                                |
|------------------------------------------------------------------------|-----------------------------------------------------------------------------------------------------------------------------------------------------------------------------------------------------------------------------------------------------------------------------------------------------------------------------------------------------------------------------------------------------------------------------------------------------------------------------------------------------------------------------------------------------------------------------------------------------------------------------------------------------|---------------------------------------------------------------------------------------------------------------------------------------------------------------------------------------------------------------------------------------------------------------------------------------------------------------------------------------------------------------------------------------------------------------------------------------------------------------------------------------------------------------------------------------------------------------------------------------------------------------------------------------------------------------------------------------------------------------------------------------------------------------------------------------------------------------------------------------------------------------------------------------------------------------------------------------------------------------------------------------------------------------------------------------------------------------------------------------------------------------|
| MOTOR REHABILITATION                                                   | <b>INDIVIDUAL NEUROMOTOR PHYSIOTHERAPY</b> <ul style="list-style-type: none"> <li>• To improve surveillance and interaction with the environment</li> <li>• To improve or maintain the joint flexibility</li> <li>• To prevent spastic Hypertone</li> <li>• To improve respiratory dynamics by strengthening the inspiratory and expiratory muscles to promote bronchial secretion management</li> <li>• To check orthostatic hypotension and neurovegetative reactions during sitting position and verticalization</li> <li>• To monitor Pain using the Nociceptive Coma Scale</li> <li>• To inhibit reflexes and pathological postures</li> </ul> | <b>INDIVIDUAL NEUROMOTOR PHYSIOTHERAPY</b> <ul style="list-style-type: none"> <li>• To promote neurobehavioral alterations control (state of psychomotor agitation, apathy, disinhibition)</li> <li>• To improve orientation in time and space</li> <li>• To improve focal attention</li> <li>• To improve or maintain the joint flexibility</li> <li>• To enhance the residual mobility</li> <li>• To prevent Spastic Hypertone</li> <li>• To improve respiratory dynamics by strengthening the inspiratory and expiratory muscles to promote tracheobronchial secretion management</li> <li>• To check orthostatic hypotension and neurovegetative reactions during sitting position and verticalization</li> <li>• To monitor Pain using the Nociceptive Coma Scale</li> <li>• To prevent Musculotendon retraction through Passive Mobilization</li> <li>• To improve balance and posture and postural responses in sitting and orthostatic position</li> <li>• To improve trunk control and coordination in simple movements</li> <li>• To reduce the Neglet Syndrome using the mirror therapy</li> </ul> |
|                                                                        | <i>LCF=1-3</i>                                                                                                                                                                                                                                                                                                                                                                                                                                                                                                                                                                                                                                      | <i>LCF=4-6</i>                                                                                                                                                                                                                                                                                                                                                                                                                                                                                                                                                                                                                                                                                                                                                                                                                                                                                                                                                                                                                                                                                                |
| SPEACH THERAPY                                                         | <ul style="list-style-type: none"> <li>• To improve surveillance and interaction with the environment</li> <li>• To improve swallowing dynamics by promoting oral nutrition</li> <li>• To improve the ability to understand verbal /non-verbal messages</li> <li>• To improve management of salivary and tracheobronchial secretions</li> <li>• To inhibit pathological oral reflexes</li> </ul>                                                                                                                                                                                                                                                    | <ul style="list-style-type: none"> <li>• To improve swallowing dynamics by promoting oral nutrition with a safe semi-solid/soft diet</li> <li>• To improve the ability to understand verbal/non-verbal messages</li> <li>• To improve management of salivary and tracheobronchial secretions</li> <li>• To evaluate and manage the weaning path of the tracheostomic cannula</li> <li>• To improve the ability to understand verbal/non-verbal messages</li> <li>• To improve visuospatial perception</li> <li>• To involve the rehabilitation team, the family members and/or caregivers in the observation and stimulation of swallowing and communication functions</li> </ul>                                                                                                                                                                                                                                                                                                                                                                                                                             |
| Neurocognitive treatment when LCF>5 and anterograde amnesia resolution |                                                                                                                                                                                                                                                                                                                                                                                                                                                                                                                                                                                                                                                     | <ul style="list-style-type: none"> <li>• To evaluate the cognitive profile through appropriated cognitive batteries as needed</li> <li>• To personify neurocognitive treatment as needed</li> </ul>                                                                                                                                                                                                                                                                                                                                                                                                                                                                                                                                                                                                                                                                                                                                                                                                                                                                                                           |

Legend: LCF: Level of Cognitive Functioning

**Table SM2:** Supplementary material, Rehabilitative treatment
